# Supplementary material for: Correlation of the systemic immune-inflammation index with short- and long-term prognosis after acute ischemic stroke
Source: Aging (Albany NY). 2022 Aug 19;14(16):6567–78. doi: 10.18632/aging.204228 (PMC9467411; doi:10.18632/aging.204228)
Supplement: Supplementary Figure 1 [file aging-14-204228-s001.pdf]

## SUPPLEMENTARY FIGURE

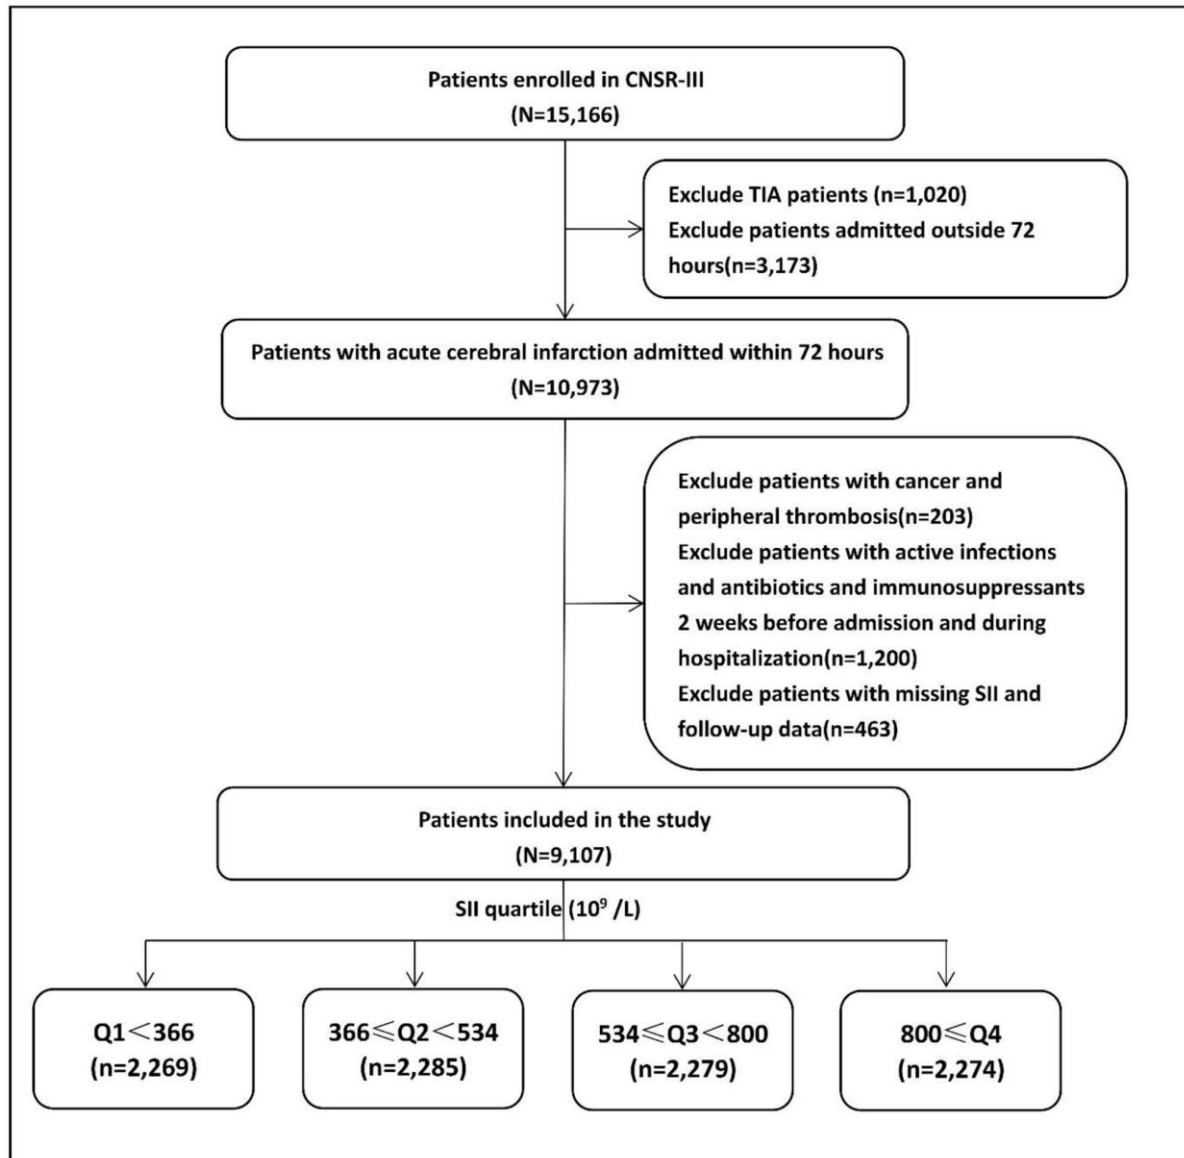

**Supplementary Figure 1. Flow chart of inclusion and exclusion criteria for the study population.** Based on the inclusion and exclusion criteria (see Methods for details), we selected the population to be studied. Abbreviations: CNSR-III: China National Stroke Registry III; SII: systemic immune inflammation index (neutrophil × platelet/lymphocyte,  $10^9/L$ ).
