# Supplementary material for: Correlation of the systemic immune-inflammation index with short- and long-term prognosis after acute ischemic stroke
Source: publisher site journal article supplement (doi:10.18632/aging.204228), 2022-08-19
Supplement: Supplementary file [file aging-v14i16-204228-supplementary-material-SD2.pdf]

## SUPPLEMENTARY TABLE

Supplementary Table 1. Baseline comparison of patients with included and excluded.

| Characteristics                                                | Included patients  | Excluded patients  | P-value |
|----------------------------------------------------------------|--------------------|--------------------|---------|
| <b>Demography and clinical features</b>                        |                    |                    |         |
| Age(yr), mean $\pm$ SD                                         | 61.88 $\pm$ 11.11  | 62.76 $\pm$ 11.57  | <.0001  |
| Male, <i>n</i> (%)                                             | 6343 (69.7)        | 4021 (66.4)        | <.0001  |
| Smoking, <i>n</i> (%)                                          | 3317 (36.4)        | 2095 (34.6)        | 0.0201  |
| Drinking, <i>n</i> (%)                                         | 3553 (39.0)        | 2162 (35.7)        | <.0001  |
| <b>Medical history</b>                                         |                    |                    |         |
| Ischemic stroke, <i>n</i> (%)                                  | 1850 (20.3)        | 1299 (21.4)        | 0.0943  |
| Coronary heart diseases, <i>n</i> (%)                          | 914 (10.0)         | 694 (11.5)         | 0.0055  |
| Atrial fibrillation, <i>n</i> (%)                              | 592 (6.5)          | 427 (7.1)          | 0.1876  |
| Hypertension, <i>n</i> (%)                                     | 5717 (62.8)        | 3777 (62.3)        | 0.5843  |
| Diabetes mellitus, <i>n</i> (%)                                | 2126 (23.3)        | 1384 (22.8)        | 0.4722  |
| Hypercholesterolemia, <i>n</i> (%)                             | 696 (7.6)          | 495 (8.2)          | 0.2372  |
| <b>Hours of event onset, median (IQR)</b>                      | 10 (3–25)          | 20 (3–76)          | <.0001  |
| <b>NIHSS at admission, median (IQR)</b>                        | 3 (2–6)            | 3 (1–6)            | <.0001  |
| <b>mRS score before onset <math>\geq</math>3, <i>n</i> (%)</b> | 370 (4.1)          | 287 (4.7)          | 0.0458  |
| <b>Laboratory tests</b>                                        |                    |                    |         |
| WBC, ( $10^9/L$ )                                              | 7.24 $\pm$ 2.21    | 7.91 $\pm$ 40.32   | 0.0561  |
| Neutrophil, ( $10^9/L$ )                                       | 4.85 $\pm$ 2.23    | 4.99 $\pm$ 2.32    | 0.0463  |
| Platelet, ( $10^9/L$ )                                         | 217.60 $\pm$ 63.37 | 217.32 $\pm$ 65.61 | 0.2199  |
| Lymphocyte, ( $10^9/L$ )                                       | 1.81 $\pm$ 0.79    | 1.78 $\pm$ 0.84    | 0.0106  |
| FPG (mmol/L)                                                   | 6.46 $\pm$ 2.62    | 6.34 $\pm$ 2.49    | 0.0210  |
| LDL (mmol/L)                                                   | 2.56 $\pm$ 1.04    | 2.55 $\pm$ 1.06    | 0.1947  |
| HCY ( $\mu$ mol/L)                                             | 18.93 $\pm$ 12.26  | 19.24 $\pm$ 12.47  | 0.0425  |
| hs-CRP (mg/L)                                                  | 5.67 $\pm$ 18.22   | 10.74 $\pm$ 33.76  | <.0001  |

Abbreviations: SD: standard deviation; IQR: interquartile range; NIHSS: National Institutes of Health Stroke Scale; Q: quartile; mRS: modified Rankin Scale; WBC: white blood cell; FPG: fasting plasma glucose; LDL: low-density lipoprotein; Hcy: homocysteine; hs-CRP: high sensitivity C reactive protein.
